# Supplementary material
Source: PubMed Central journal article supplement (PMC8939287)
Supplement: NIHMS1784847-supplement-1.pdf [file NIHMS1784847-supplement-1.pdf]

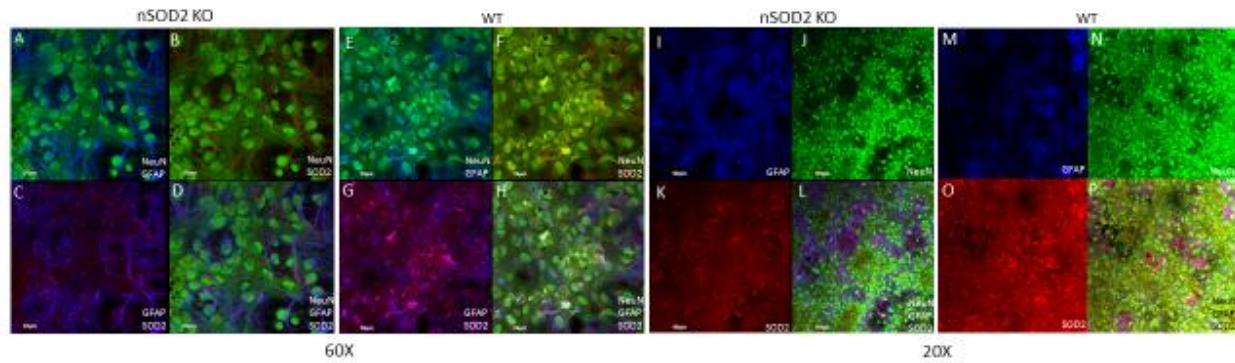

**Supplemental Figure 1.** IHC was performed on mixed cortical cultures derived from nSOD2 KO mice (a-d, i-l) and WT siblings (e-h,m-p)(pnd 3-5) and imaged at both 60 (a-h) and 20X (i-p). Cells were co-stained with NeuN (green), GFAP (blue) and SOD2 (red). Co-staining reveals overlap between NeuN and SOD2 in WT cultures (f,h,p) but is absent in nSOD2 KO cultures (b,d,l).

| UniGene    | GeneBank     | Symbol | Description                                                       | UniGene   | GeneBank  | Symbol  | Description                              |
|------------|--------------|--------|-------------------------------------------------------------------|-----------|-----------|---------|------------------------------------------|
| Min_10713  | NM_009424    | Abi    | Abiura                                                            | Min_3688  | NM_023823 | Men     | Menyoneinone                             |
| Min_17208  | NM_020717    | Abi3   | Allylthiohydroxyethyl sulfonamide 2 (sponacid) homolog (Sponacid) | Min_42629 | NM_023816 | Menf    | Menyoneinone-related factor 1            |
| Min_37500  | NM_009416    | Abi1   | Allylthiohydroxyethyl sulfonamide 1                               | Min_17022 | NM_023817 | Menp    | Menyoneinone-related factor 2            |
| Min_36171  | NM_007402    | Abc    | Adenosine phosphoribosyl transferase                              | Min_4118  | NM_008414 | Meg     | Megakaryin                               |
| Min_30130  | NM_009494    | Ame    | Adenosine phosphoribosyl transferase                              | Min_29911 | NM_023901 | Menp2   | Menyoneinone-related factor 2, isoform 1 |
| Min_21240  | NM_021984    | Ala    | Ala                                                               | Min_21682 | NM_021993 | Menr    | Menyoneinone-related factor 1            |
| Min_4215   | NM_009506    | Ala    | Ala                                                               | Min_31748 | NM_023940 | Menr2   | Menyoneinone-related factor 2            |
| Min_28348  | NM_023853    | Ala5   | Ala5                                                              | Min_31814 | NM_023941 | Menr3   | Menyoneinone-related factor 3            |
| Min_43417  | NM_023852    | Ala6   | Ala6                                                              | Min_39211 | NM_023986 | Menr4   | Menyoneinone-related factor 4            |
| Min_29255  | NM_007918    | Alp    | Aluminum phosphonate                                              | Min_42121 | NM_023987 | Menr5   | Menyoneinone-related factor 5            |
| Min_31121  | NM_007805    | Cyto   | Cytosine                                                          | Min_30249 | NM_021024 | Menr6   | Menyoneinone-related factor 6            |
| Min_34908  | NM_000004    | Cytb   | Cytochrome b                                                      | Min_30250 | NM_021025 | Menr7   | Menyoneinone-related factor 7            |
| Min_41150  | NM_021005    | Dnm2   | Dynamin 2                                                         | Min_30251 | NM_021026 | Menr8   | Menyoneinone-related factor 8            |
| Min_12830  | NM_001092    | Dnm1   | Dynamin 1                                                         | Min_30252 | NM_021027 | Menr9   | Menyoneinone-related factor 9            |
| Min_43817  | NM_023848    | Edi2   | Endonuclease domain 2                                             | Min_481   | NM_021150 | Menr    | Menyoneinone-related factor              |
| Min_1215   | NM_007946    | Em     | Endonuclease                                                      | Min_30253 | NM_021028 | Menr10  | Menyoneinone-related factor 10           |
| Min_34576  | NM_007949    | Fuv3   | Endonuclease domain 3                                             | Min_27434 | NM_008020 | Menr11  | Menyoneinone-related factor 11           |
| Min_181818 | NM_001081201 | Emc6   | Endonuclease domain 6                                             | Min_32744 | NM_021151 | Menr12  | Menyoneinone-related factor 12           |
| Min_15158  | NM_007965    | Fmsc   | Fmsc                                                              | Min_498   | NM_009025 | Menr13  | Menyoneinone-related factor 13           |
| Min_40929  | NM_008883    | Fmsc2  | Fmsc2                                                             | Min_18313 | NM_008713 | Menr14  | Menyoneinone-related factor 14           |
| Min_1776   | NM_020239    | H6.1   | H6.1                                                              | Min_42122 | NM_023988 | Menr15  | Menyoneinone-related factor 15           |
| Min_48389  | NM_021075    | Glcn   | Glucosyltransferase                                               | Min_14420 | NM_023989 | Menr16  | Menyoneinone-related factor 16           |
| Min_29276  | NM_008139    | Gln3   | Glutamine synthetase 3                                            | Min_13356 | NM_023990 | Menr17  | Menyoneinone-related factor 17           |
| Min_1290   | NM_008140    | Gln1   | Glutamine synthetase 1                                            | Min_17125 | NM_021114 | Menr18  | Menyoneinone-related factor 18           |
| Min_44168  | NM_020617    | Gln2   | Glutamine synthetase 2                                            | Min_30616 | NM_023991 | Menr19  | Menyoneinone-related factor 19           |
| Min_30016  | NM_008141    | Gln4   | Glutamine synthetase 4                                            | Min_42627 | NM_023992 | Menr20  | Menyoneinone-related factor 20           |
| Min_30123  | NM_008142    | Gln5   | Glutamine synthetase 5                                            | Min_40889 | NM_021115 | Menr21  | Menyoneinone-related factor 21           |
| Min_30124  | NM_008143    | Gln6   | Glutamine synthetase 6                                            | Min_21810 | NM_021030 | Menr22  | Menyoneinone-related factor 22           |
| Min_30125  | NM_008144    | Gln7   | Glutamine synthetase 7                                            | Min_30050 | NM_021031 | Menr23  | Menyoneinone-related factor 23           |
| Min_30126  | NM_008145    | Gln8   | Glutamine synthetase 8                                            | Min_22923 | NM_021116 | Menr24  | Menyoneinone-related factor 24           |
| Min_30127  | NM_008146    | Gln9   | Glutamine synthetase 9                                            | Min_17118 | NM_021031 | Menr25  | Menyoneinone-related factor 25           |
| Min_30128  | NM_008147    | Gln10  | Glutamine synthetase 10                                           | Min_40890 | NM_021117 | Menr26  | Menyoneinone-related factor 26           |
| Min_30129  | NM_008148    | Gln11  | Glutamine synthetase 11                                           | Min_30051 | NM_021032 | Menr27  | Menyoneinone-related factor 27           |
| Min_30130  | NM_008149    | Gln12  | Glutamine synthetase 12                                           | Min_40891 | NM_021118 | Menr28  | Menyoneinone-related factor 28           |
| Min_30131  | NM_008150    | Gln13  | Glutamine synthetase 13                                           | Min_30052 | NM_021033 | Menr29  | Menyoneinone-related factor 29           |
| Min_30132  | NM_008151    | Gln14  | Glutamine synthetase 14                                           | Min_40892 | NM_021119 | Menr30  | Menyoneinone-related factor 30           |
| Min_30133  | NM_008152    | Gln15  | Glutamine synthetase 15                                           | Min_30053 | NM_021034 | Menr31  | Menyoneinone-related factor 31           |
| Min_30134  | NM_008153    | Gln16  | Glutamine synthetase 16                                           | Min_40893 | NM_021120 | Menr32  | Menyoneinone-related factor 32           |
| Min_30135  | NM_008154    | Gln17  | Glutamine synthetase 17                                           | Min_30054 | NM_021035 | Menr33  | Menyoneinone-related factor 33           |
| Min_30136  | NM_008155    | Gln18  | Glutamine synthetase 18                                           | Min_40894 | NM_021121 | Menr34  | Menyoneinone-related factor 34           |
| Min_30137  | NM_008156    | Gln19  | Glutamine synthetase 19                                           | Min_30055 | NM_021036 | Menr35  | Menyoneinone-related factor 35           |
| Min_30138  | NM_008157    | Gln20  | Glutamine synthetase 20                                           | Min_40895 | NM_021122 | Menr36  | Menyoneinone-related factor 36           |
| Min_30139  | NM_008158    | Gln21  | Glutamine synthetase 21                                           | Min_30056 | NM_021037 | Menr37  | Menyoneinone-related factor 37           |
| Min_30140  | NM_008159    | Gln22  | Glutamine synthetase 22                                           | Min_40896 | NM_021123 | Menr38  | Menyoneinone-related factor 38           |
| Min_30141  | NM_008160    | Gln23  | Glutamine synthetase 23                                           | Min_30057 | NM_021038 | Menr39  | Menyoneinone-related factor 39           |
| Min_30142  | NM_008161    | Gln24  | Glutamine synthetase 24                                           | Min_40897 | NM_021124 | Menr40  | Menyoneinone-related factor 40           |
| Min_30143  | NM_008162    | Gln25  | Glutamine synthetase 25                                           | Min_30058 | NM_021039 | Menr41  | Menyoneinone-related factor 41           |
| Min_30144  | NM_008163    | Gln26  | Glutamine synthetase 26                                           | Min_40898 | NM_021125 | Menr42  | Menyoneinone-related factor 42           |
| Min_30145  | NM_008164    | Gln27  | Glutamine synthetase 27                                           | Min_30059 | NM_021040 | Menr43  | Menyoneinone-related factor 43           |
| Min_30146  | NM_008165    | Gln28  | Glutamine synthetase 28                                           | Min_40899 | NM_021126 | Menr44  | Menyoneinone-related factor 44           |
| Min_30147  | NM_008166    | Gln29  | Glutamine synthetase 29                                           | Min_30060 | NM_021041 | Menr45  | Menyoneinone-related factor 45           |
| Min_30148  | NM_008167    | Gln30  | Glutamine synthetase 30                                           | Min_40900 | NM_021127 | Menr46  | Menyoneinone-related factor 46           |
| Min_30149  | NM_008168    | Gln31  | Glutamine synthetase 31                                           | Min_30061 | NM_021042 | Menr47  | Menyoneinone-related factor 47           |
| Min_30150  | NM_008169    | Gln32  | Glutamine synthetase 32                                           | Min_40901 | NM_021128 | Menr48  | Menyoneinone-related factor 48           |
| Min_30151  | NM_008170    | Gln33  | Glutamine synthetase 33                                           | Min_30062 | NM_021043 | Menr49  | Menyoneinone-related factor 49           |
| Min_30152  | NM_008171    | Gln34  | Glutamine synthetase 34                                           | Min_40902 | NM_021129 | Menr50  | Menyoneinone-related factor 50           |
| Min_30153  | NM_008172    | Gln35  | Glutamine synthetase 35                                           | Min_30063 | NM_021044 | Menr51  | Menyoneinone-related factor 51           |
| Min_30154  | NM_008173    | Gln36  | Glutamine synthetase 36                                           | Min_40903 | NM_021130 | Menr52  | Menyoneinone-related factor 52           |
| Min_30155  | NM_008174    | Gln37  | Glutamine synthetase 37                                           | Min_30064 | NM_021045 | Menr53  | Menyoneinone-related factor 53           |
| Min_30156  | NM_008175    | Gln38  | Glutamine synthetase 38                                           | Min_40904 | NM_021131 | Menr54  | Menyoneinone-related factor 54           |
| Min_30157  | NM_008176    | Gln39  | Glutamine synthetase 39                                           | Min_30065 | NM_021046 | Menr55  | Menyoneinone-related factor 55           |
| Min_30158  | NM_008177    | Gln40  | Glutamine synthetase 40                                           | Min_40905 | NM_021132 | Menr56  | Menyoneinone-related factor 56           |
| Min_30159  | NM_008178    | Gln41  | Glutamine synthetase 41                                           | Min_30066 | NM_021047 | Menr57  | Menyoneinone-related factor 57           |
| Min_30160  | NM_008179    | Gln42  | Glutamine synthetase 42                                           | Min_40906 | NM_021133 | Menr58  | Menyoneinone-related factor 58           |
| Min_30161  | NM_008180    | Gln43  | Glutamine synthetase 43                                           | Min_30067 | NM_021048 | Menr59  | Menyoneinone-related factor 59           |
| Min_30162  | NM_008181    | Gln44  | Glutamine synthetase 44                                           | Min_40907 | NM_021134 | Menr60  | Menyoneinone-related factor 60           |
| Min_30163  | NM_008182    | Gln45  | Glutamine synthetase 45                                           | Min_30068 | NM_021049 | Menr61  | Menyoneinone-related factor 61           |
| Min_30164  | NM_008183    | Gln46  | Glutamine synthetase 46                                           | Min_40908 | NM_021135 | Menr62  | Menyoneinone-related factor 62           |
| Min_30165  | NM_008184    | Gln47  | Glutamine synthetase 47                                           | Min_30069 | NM_021050 | Menr63  | Menyoneinone-related factor 63           |
| Min_30166  | NM_008185    | Gln48  | Glutamine synthetase 48                                           | Min_40909 | NM_021136 | Menr64  | Menyoneinone-related factor 64           |
| Min_30167  | NM_008186    | Gln49  | Glutamine synthetase 49                                           | Min_30070 | NM_021051 | Menr65  | Menyoneinone-related factor 65           |
| Min_30168  | NM_008187    | Gln50  | Glutamine synthetase 50                                           | Min_40910 | NM_021137 | Menr66  | Menyoneinone-related factor 66           |
| Min_30169  | NM_008188    | Gln51  | Glutamine synthetase 51                                           | Min_30071 | NM_021052 | Menr67  | Menyoneinone-related factor 67           |
| Min_30170  | NM_008189    | Gln52  | Glutamine synthetase 52                                           | Min_40911 | NM_021138 | Menr68  | Menyoneinone-related factor 68           |
| Min_30171  | NM_008190    | Gln53  | Glutamine synthetase 53                                           | Min_30072 | NM_021053 | Menr69  | Menyoneinone-related factor 69           |
| Min_30172  | NM_008191    | Gln54  | Glutamine synthetase 54                                           | Min_40912 | NM_021139 | Menr70  | Menyoneinone-related factor 70           |
| Min_30173  | NM_008192    | Gln55  | Glutamine synthetase 55                                           | Min_30073 | NM_021054 | Menr71  | Menyoneinone-related factor 71           |
| Min_30174  | NM_008193    | Gln56  | Glutamine synthetase 56                                           | Min_40913 | NM_021140 | Menr72  | Menyoneinone-related factor 72           |
| Min_30175  | NM_008194    | Gln57  | Glutamine synthetase 57                                           | Min_30074 | NM_021055 | Menr73  | Menyoneinone-related factor 73           |
| Min_30176  | NM_008195    | Gln58  | Glutamine synthetase 58                                           | Min_40914 | NM_021141 | Menr74  | Menyoneinone-related factor 74           |
| Min_30177  | NM_008196    | Gln59  | Glutamine synthetase 59                                           | Min_30075 | NM_021056 | Menr75  | Menyoneinone-related factor 75           |
| Min_30178  | NM_008197    | Gln60  | Glutamine synthetase 60                                           | Min_40915 | NM_021142 | Menr76  | Menyoneinone-related factor 76           |
| Min_30179  | NM_008198    | Gln61  | Glutamine synthetase 61                                           | Min_30076 | NM_021057 | Menr77  | Menyoneinone-related factor 77           |
| Min_30180  | NM_008199    | Gln62  | Glutamine synthetase 62                                           | Min_40916 | NM_021143 | Menr78  | Menyoneinone-related factor 78           |
| Min_30181  | NM_008200    | Gln63  | Glutamine synthetase 63                                           | Min_30077 | NM_021058 | Menr79  | Menyoneinone-related factor 79           |
| Min_30182  | NM_008201    | Gln64  | Glutamine synthetase 64                                           | Min_40917 | NM_021144 | Menr80  | Menyoneinone-related factor 80           |
| Min_30183  | NM_008202    | Gln65  | Glutamine synthetase 65                                           | Min_30078 | NM_021059 | Menr81  | Menyoneinone-related factor 81           |
| Min_30184  | NM_008203    | Gln66  | Glutamine synthetase 66                                           | Min_40918 | NM_021145 | Menr82  | Menyoneinone-related factor 82           |
| Min_30185  | NM_008204    | Gln67  | Glutamine synthetase 67                                           | Min_30079 | NM_021060 | Menr83  | Menyoneinone-related factor 83           |
| Min_30186  | NM_008205    | Gln68  | Glutamine synthetase 68                                           | Min_40919 | NM_021146 | Menr84  | Menyoneinone-related factor 84           |
| Min_30187  | NM_008206    | Gln69  | Glutamine synthetase 69                                           | Min_30080 | NM_021061 | Menr85  | Menyoneinone-related factor 85           |
| Min_30188  | NM_008207    | Gln70  | Glutamine synthetase 70                                           | Min_40920 | NM_021147 | Menr86  | Menyoneinone-related factor 86           |
| Min_30189  | NM_008208    | Gln71  | Glutamine synthetase 71                                           | Min_30081 | NM_021062 | Menr87  | Menyoneinone-related factor 87           |
| Min_30190  | NM_008209    | Gln72  | Glutamine synthetase 72                                           | Min_40921 | NM_021148 | Menr88  | Menyoneinone-related factor 88           |
| Min_30191  | NM_008210    | Gln73  | Glutamine synthetase 73                                           | Min_30082 | NM_021063 | Menr89  | Menyoneinone-related factor 89           |
| Min_30192  | NM_008211    | Gln74  | Glutamine synthetase 74                                           | Min_40922 | NM_021149 | Menr90  | Menyoneinone-related factor 90           |
| Min_30193  | NM_008212    | Gln75  | Glutamine synthetase 75                                           | Min_30083 | NM_021064 | Menr91  | Menyoneinone-related factor 91           |
| Min_30194  | NM_008213    | Gln76  | Glutamine synthetase 76                                           | Min_40923 | NM_021150 | Menr92  | Menyoneinone-related factor 92           |
| Min_30195  | NM_008214    | Gln77  | Glutamine synthetase 77                                           | Min_30084 | NM_021065 | Menr93  | Menyoneinone-related factor 93           |
| Min_30196  | NM_008215    | Gln78  | Glutamine synthetase 78                                           | Min_40924 | NM_021151 | Menr94  | Menyoneinone-related factor 94           |
| Min_30197  | NM_008216    | Gln79  | Glutamine synthetase 79                                           | Min_30085 | NM_021066 | Menr95  | Menyoneinone-related factor 95           |
| Min_30198  | NM_008217    | Gln80  | Glutamine synthetase 80                                           | Min_40925 | NM_021152 | Menr96  | Menyoneinone-related factor 96           |
| Min_30199  | NM_008218    | Gln81  | Glutamine synthetase 81                                           | Min_30086 | NM_021067 | Menr97  | Menyoneinone-related factor 97           |
| Min_30200  | NM_008219    | Gln82  | Glutamine synthetase 82                                           | Min_40926 | NM_021153 | Menr98  | Menyoneinone-related factor 98           |
| Min_30201  | NM_008220    | Gln83  | Glutamine synthetase 83                                           | Min_30087 | NM_021068 | Menr99  | Menyoneinone-related factor 99           |
| Min_30202  | NM_008221    | Gln84  | Glutamine synthetase 84                                           | Min_40927 | NM_021154 | Menr100 | Menyoneinone-related factor 100          |

**Supplemental Table 1.** Complete list of oxidative stress and antioxidant defense genes included in the RT2 Profiler PCR Array (Qiagen) .

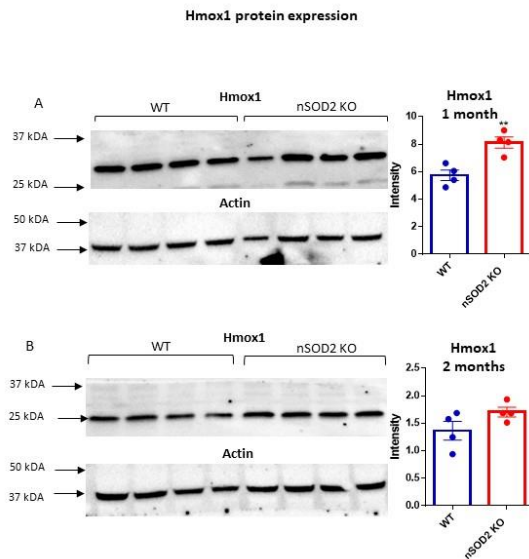

**Supplemental Figure 2.** (A) Western blot of the Nrf2 target Hmox1 and actin in cortex of one month old mice shows a significant increase in protein expression (unpaired t test,  $p=0.0052$ ,  $n=4$ ). (B) Hmox1 protein in two month old mice and actin reveals a non-significant trend in protein expression (unpaired t test,  $p=0.1236$ ,  $n=4$ ).

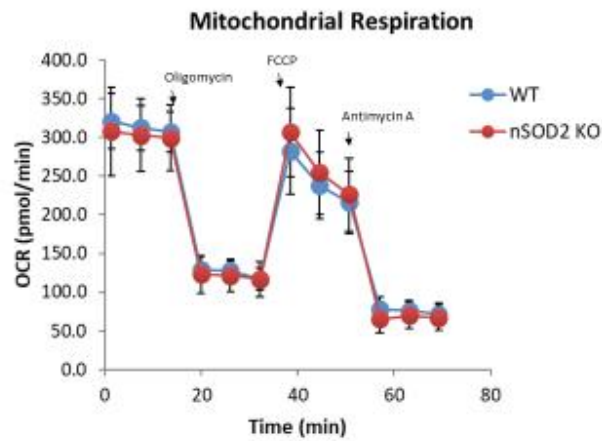

**Supplemental Figure 3.** Neuronal SOD2 deficiency does not alter mitochondrial function as measured by XF Cell Mito stress test in primary cortical cells cultured from P3-5 nSOD2 KO and WT mice.

| Gene Symbol | p-value(KO vs. WT) | Fold-Change(KO vs. WT) |
|-------------|--------------------|------------------------|
| Gfap        | 5.30E-17           | 4.4327                 |
| Lamp5       | 1.63E-14           | -2.1896                |
| Serpina3n   | 4.11E-14           | 5.01746                |
| Vim         | 6.36E-14           | 3.32499                |
| Rgs7bp      | 1.07E-13           | -1.30012               |
| Ccl3        | 1.39E-13           | 6.28238                |
| Cd44        | 1.62E-13           | 3.60626                |
| Gm3435      | 2.84E-13           | 3.0426                 |
| Pdp1        | 2.91E-13           | -1.64141               |
| Nol4        | 6.00E-13           | -1.54064               |
| Cast        | 8.03E-13           | 1.89546                |
| Tnfrsf1a    | 8.51E-13           | 2.54838                |
| Camkk2      | 1.04E-12           | -1.89174               |
| H2-L        | 1.86E-12           | 2.32009                |
| Ifitm3      | 2.24E-12           | 3.14884                |
| Fkbp7       | 2.25E-12           | 2.21788                |
| Ucp2        | 3.63E-12           | 2.57857                |
| Dcn         | 4.46E-12           | 3.18553                |
| Arpp19      | 5.45E-12           | -1.90534               |

**Supplemental Table 2:** Gene expression analysis in cortical tissue of 2 month old nSOD2 mice.

The top 20 of 3,807 differentially expressed genes in nSOD2 mice.
